# Supplementary material
Source: PubMed Central journal article supplement (PMC3672406)
Supplement: NIHMS469343-supplement-Supplementary.pdf [file NIHMS469343-supplement-Supplementary.pdf]

# Isolation of primitive endoderm, mesoderm, vascular endothelial and trophoblast progenitors from human pluripotent stem cells

Micha Drukker, Chad Tang, Reza Ardehali, Yuval Rinkevich, Jun Seita, Andrew S. Lee, Adriane R. Mosley, Irving L. Weissman, Yoav Soen

## Supplementary Figure 1

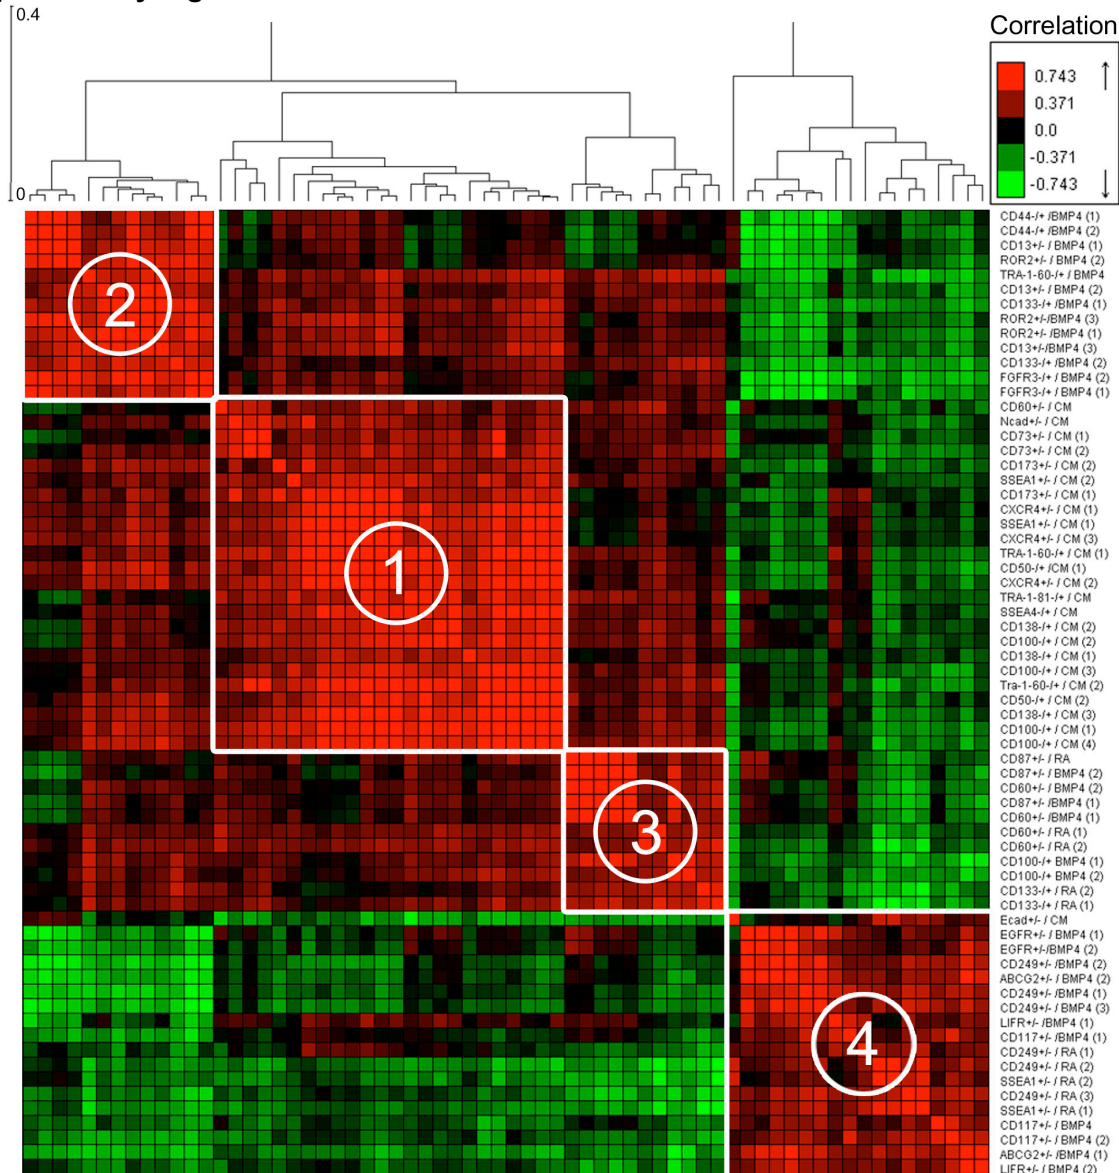

### Grouping of hESC-derived progenitors based on similarities in gene expression profiles

Shown is a clustered correlation matrix based on expression fold-change signatures displayed in Fig. 2. It reveals four main groups of cell subpopulations (numbered 1 to 4) corresponding to the four main types of progenitors. Each pixel displays the (Pearson) correlation between enrichment profiles of a pair of subpopulations, each sorted with a given surface marker following a given treatment (as outlined in Fig. 2). Biological repeats with same choice of marker and treatment cluster within the same progenitor groups. Red and green values correspond, respectively, to the extent of correlation and anti-correlation between expression fold-change profiles in pairs of sorted populations.

## Supplementary Figure 2

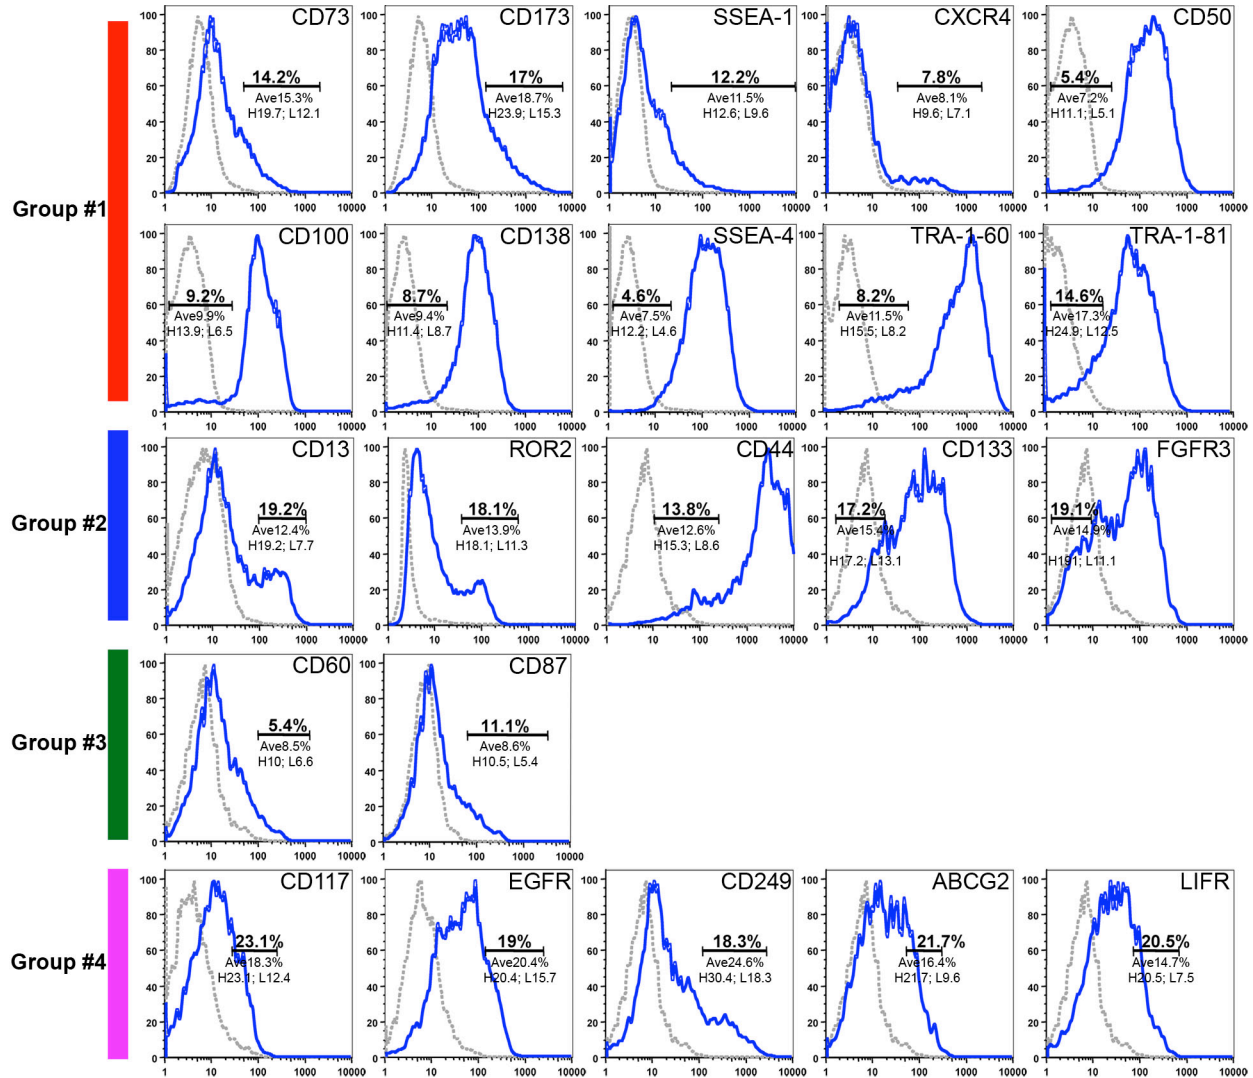

### Staining distributions of cell surface markers corresponding to the four main progenitor groups

Shown are representative FACS plots of hESCs treated for 3 days with CM (Group #1) or BMP4 (Groups #2-4). The respective cell surface markers of each of the progenitor groups are noted in four panels, along with the typical gating strategies and population frequencies. Gray dotted lines represent isotype controls. Avg, L, and H correspond, respectively, to averaged, lowest, and highest progenitor frequencies measured across 3 independent experiments.

Supplementary Figure 3

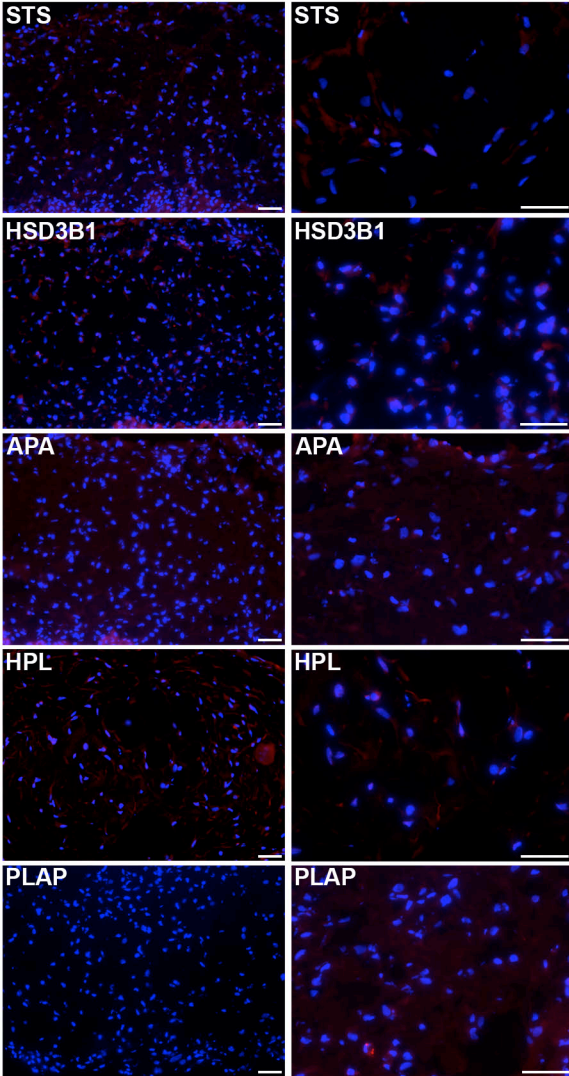

**8-week old grafts derived from ROR2+ cells do not exhibit staining of placental markers**  
Immunohistochemistry images of placental markers analyzed in grafts derived from ROR2+ cells (representing group #2 of mesoderm progenitors) demonstrating lack of staining for all the markers. Low and higher power microphotographs are shown on left and right, respectively. DAPI staining is shown in blue. Scale bar = 25 microns.

Supplementary Figure 4

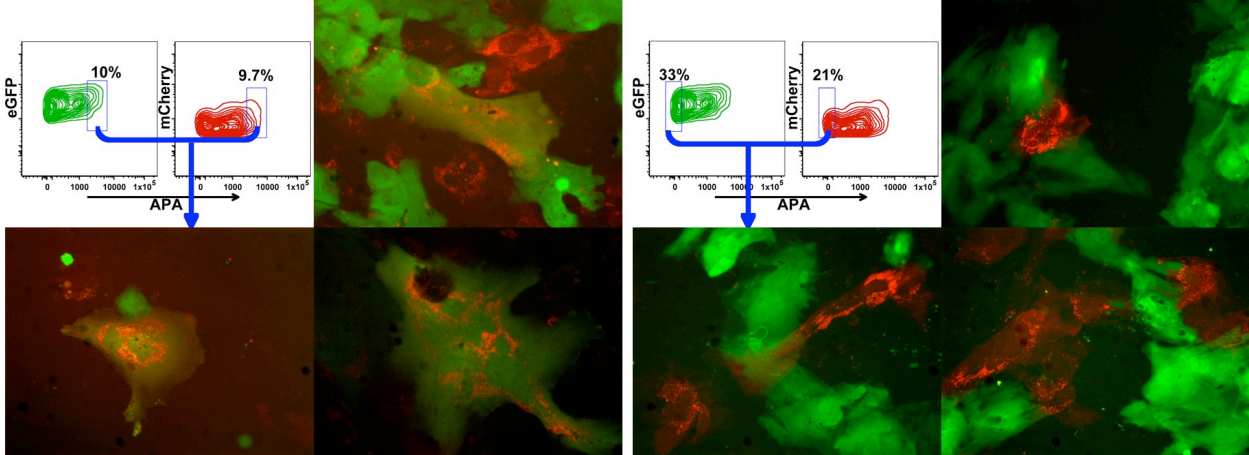

**Cultured APA+ cells produce syncytiotrophoblast-like cells**

Left: Mixture of GFP-labeled and mCherry-labeled APA+ cells (right) were cultured for 7 days (Inset shows respective FACS plots). Right: Same for APA- cells.

## Supplementary Figure 5

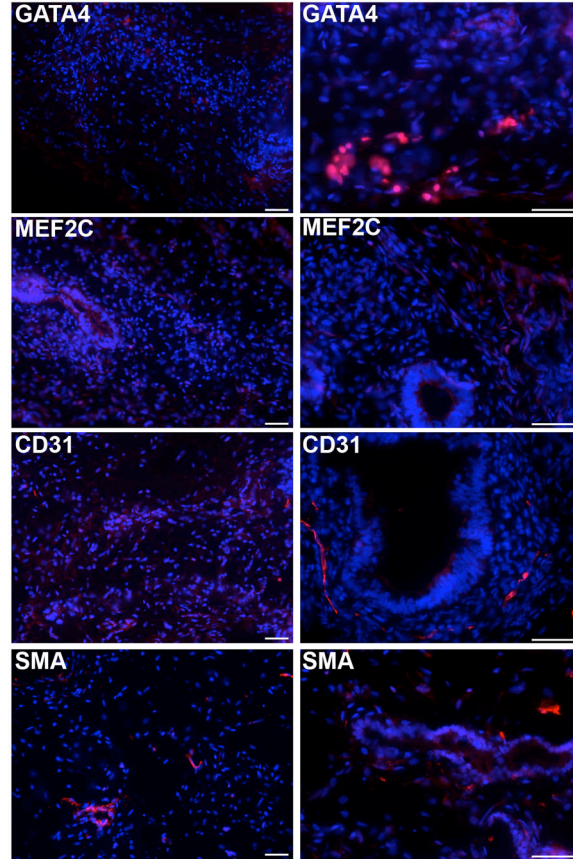

### **8-week old grafts derived from APA+ cells exhibit little or no staining of mesoderm markers**

Immunohistochemistry images of mesoderm markers analyzed on grafts derived from APA+ cells (representing group #4 of trophoblast progenitors). Infrequent or sparse staining was observed for GATA4, SMA and CD31 (PECAM1). Nuclear MEF2C signal was not detected. Low and higher power microphotographs are shown on left and right, respectively. DAPI staining is shown in blue. Scale bar = 25 microns.

### Supplementary Figure 6

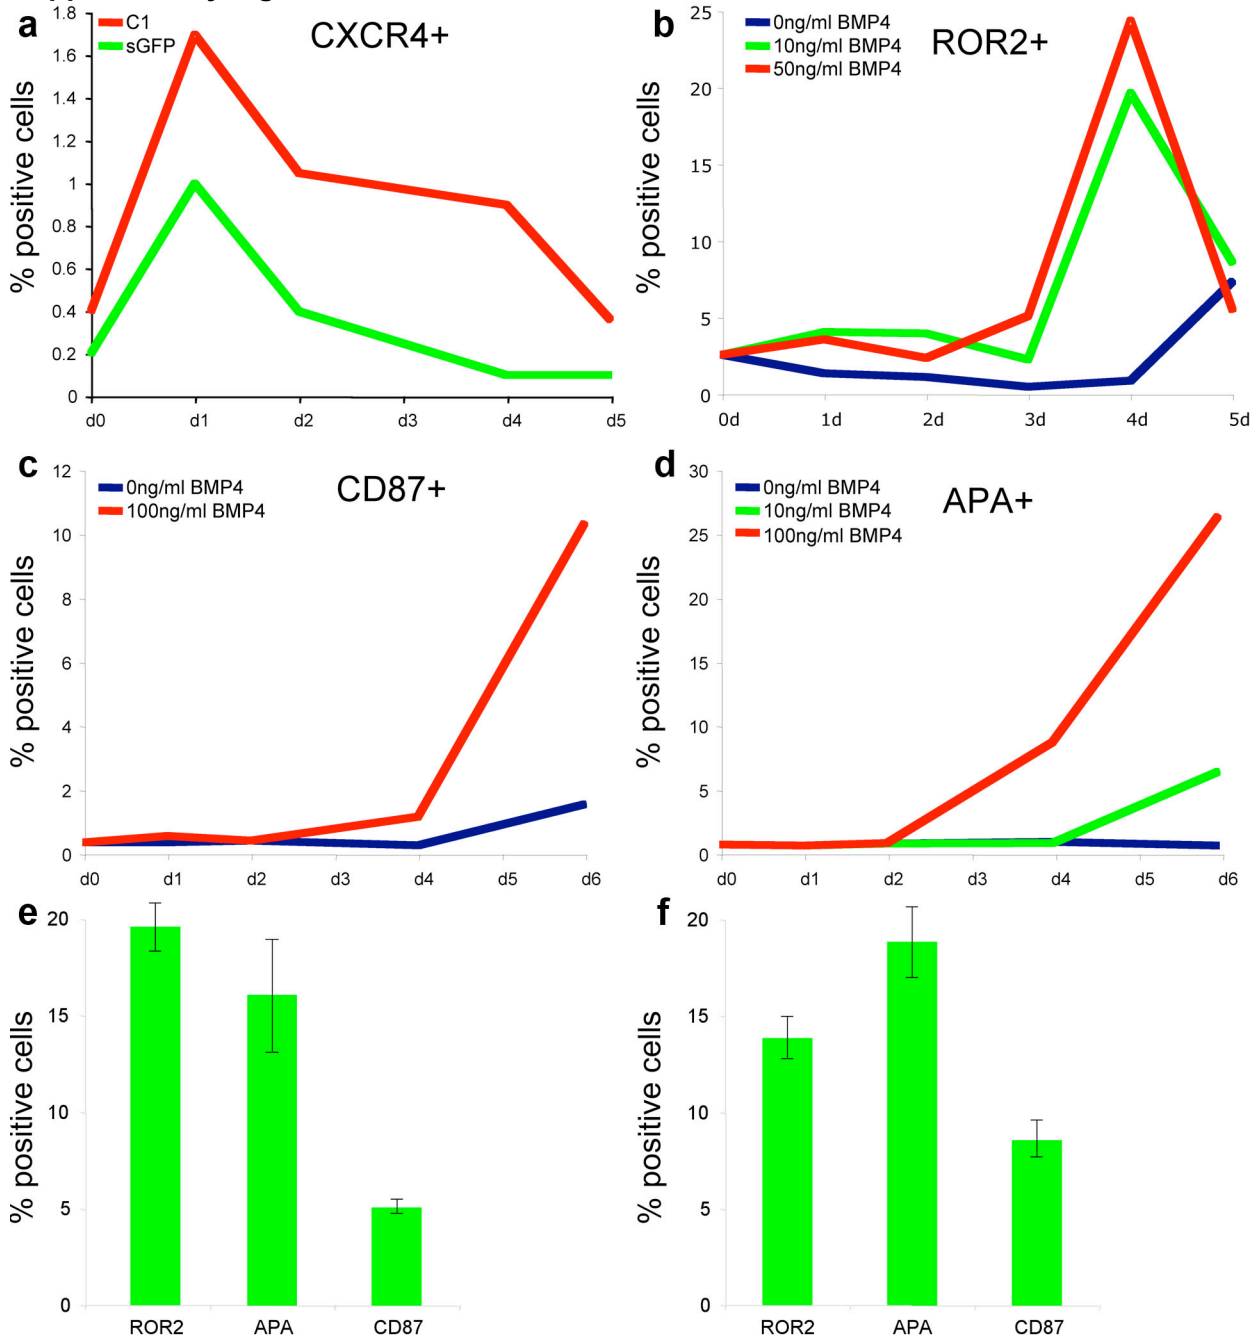

### Emergence of progenitor populations as a function of treatment duration and variation in serum lots

(a-d) Representative frequencies of the four progenitor populations as a function of time (determined by flow cytometry; one out of three experiments shown). (a) CXCR4<sup>+</sup> population peaked ~24 hrs after plating hESCs on Matrigel with CM (shown are two cell clones). (b) ROR2<sup>+</sup> population peaked around day 4 of EB differentiation and decreased afterwards. (c) CD87<sup>+</sup> population began accumulating in monolayer cultures around day 3 of treatment. (d) Emergence of the APA<sup>+</sup> population in different dosages of BMP4. (e-f) Statistics of population frequencies for ROR2 (day 4), APA (day 4) and CD87 (day 5) following treatments using different lots of FBS (e) or using the same lot in 3 independent experiments (f). Lot statistics in (e) are based on 9 batches of FBS used for differentiation of ROR2 and APA populations, and 3 batches of FBS for CD87. Error bars represent standard errors.

## Supplemental Tables

**Supplementary Table 1**  
**List of mAbs used in this study**

| <b>Antigen symbol</b>          | <b>Catalog #</b> | <b>Manufacturer*</b> | <b>Isotype</b> |
|--------------------------------|------------------|----------------------|----------------|
| A2B5                           | MAB1416          | R&D                  | Mouse IgM      |
| ABCG2                          | 552823           | BD                   | Mouse IgG2b,k  |
| ABCG2                          | MAB995           | R&D                  | Mouse IgG      |
| ACE (CD143)                    | MAB929           | R&D                  | Mouse IgG1     |
| Acetylcholine Receptor alpha   | MAB398           | Millipore            | Mouse IgG1     |
| Activin Receptor 1A            | MAB637           | R&D                  | Mouse IgG1     |
| Activin Receptor 1B            | MAB222           | R&D                  | Mouse IgG1     |
| Activin Receptor 2A/B          | MAB3391          | R&D                  | Mouse IgG1     |
| Activin Receptor 2B            | MAB3392          | R&D                  | Mouse IgG1     |
| ALCAM (CD166)                  | MAB656           | R&D                  | Mouse IgG1     |
| ALK 1                          | MAB370           | R&D                  | Mouse IgG2a    |
| Alzheimer Precursor Protein A4 | MAB348           | Millipore            | Mouse IgG1     |
| Axl                            | MAB154           | R&D                  | Mouse IgG1     |
| BACE                           | MAB5308          | Millipore            | Mouse IgG1     |
| BAFF Receptor                  | MAB1755          | R&D                  | Rat IgG2a      |
| Beta 2 microglobulin           | ab18605          | Abcam                | Mouse IgG2b    |
| BMP R1B/ALK-6 (CDw293)         | MAB505           | R&D                  | Mouse IgG2a    |
| BMP Receptor 2                 | MAB811           | R&D                  | Mouse IgG2b    |
| C Reactive Protein (CRP)       | ab10026          | Abcam                | Mouse IgG2b    |
| Cadherin 5 (VE-Caderin)        | 610251           | BD                   | Mouse IgG1     |
| Cadherin 6                     | 16111            | Progen               | Mouse IgG      |
| Cadherin17                     | MAB1072          | R&D                  | Mouse IgG2b    |
| CCR1                           | MAB145           | R&D                  | Mouse IgG2b    |
| CCR2                           | MAB150           | R&D                  | Mouse IgG2b    |
| CCR3                           | MAB155           | R&D                  | Mouse IgG2a    |
| CCR4                           | MAB1567          | R&D                  | Mouse IgG2b    |
| CCR5                           | MAB180           | R&D                  | Mouse IgG2b    |
| CCR6                           | 559560           | BD                   | Mouse IgG1, k  |
| CCR7                           | MAB197           | R&D                  | Mouse IgG2a    |
| CCR8                           | MAB1429          | R&D                  | Rat IgG2b      |
| CCR9                           | MAB179           | R&D                  | Mouse IgG2a    |
| CD10                           | 555373           | BD                   | Mouse IgG1, k  |
| CD100                          | 555499           | BD                   | Mouse IgG1, k  |
| CD101                          | 556007           | BD                   | Mouse IgG1     |
| CD103                          | 550258           | BD                   | Mouse IgG1, k  |
| CD104 (integrin beta 4)        | 555721           | BD                   | Mouse IgG1     |
| CD105                          | 555690           | BD                   | Mouse IgG1, k  |
| CD106                          | 555645           | BD                   | Mouse IgG1, k  |
| CD107A                         | 555798           | BD                   | Mouse IgG1, k  |
| CD107B                         | 555803           | BD                   | Mouse IgG1, k  |
| CD108                          | ab8222           | Abcam                | Mouse IgM      |
| CD109                          | 556039           | BD                   | Mouse IgG1     |
| CD110 (c-Mpl, Tpo Receptor)    | 551312           | BD                   | Mouse IgG1, k  |
| CD112 (PRR2)                   | 551056           | BD                   | Mouse IgG1, k  |
| CD114                          | 554536           | BD                   | Mouse IgG1, k  |

|                                |             |                 |                |
|--------------------------------|-------------|-----------------|----------------|
| CD116                          | 551284      | BD              | Rat IgG1       |
| CD117                          | 555713      | BD              | Mouse IgG1, k  |
| CD118                          | RDI-PB21385 | RDI             | Mouse IgG2a    |
| CD119                          | 558395      | BD              | Mouse IgG2b,k  |
| CD11a                          | 555382      | BD              | Mouse IgG1, k  |
| CD11b                          | 555386      | BD              | Mouse IgG1, k  |
| CD11c                          | 555391      | BD              | Mouse IgG1, k  |
| CD120a                         | 552535      | BD              | Mouse IgG1     |
| CD120b                         | 552478      | BD              | Mouse IgG1, k  |
| CD121a (sIL-1RI)               | 551388      | BD              | Mouse IgG1, k  |
| CD121b                         | ab11869     | Abcam           | Mouse IgG2a    |
| CD122                          | 554520      | BD              | Mouse IgG2a, k |
| CD123                          | 555642      | BD              | Mouse IgG1, k  |
| CD124                          | IM2072      | Beckman         | Mouse IgG1     |
| CD126                          | 551462      | BD              | Mouse IgG1, k  |
| CD127                          | 552853      | BD              | Mouse IgG1     |
| CD13                           | 555393      | BD              | Mouse IgG1, k  |
| CD130 (GP130)                  | 555756      | BD              | Mouse IgG1, k  |
| CD132                          | 555896      | BD              | Mouse IgG2b,k  |
| CD133/1                        | 130-090-422 | Miltenyi Biotec | Mouse IgG1     |
| CD133/2                        | 130-090-851 | Miltenyi Biotec | Mouse IgG2b    |
| CD134                          | 555836      | BD              | Mouse IgG1, k  |
| CD135                          | 558995      | BD              | Mouse IgG1, k  |
| CD137 (4-1BB)                  | 555955      | BD              | Mouse IgG1, k  |
| CD137 Ligand (4-1BB)           | 559445      | BD              | Mouse IgG1, k  |
| CD138                          | 551902      | BD              | Mouse IgG1, k  |
| CD14                           | 550376      | BD              | Mouse IgG2a, k |
| CD14                           | 555396      | BD              | Mouse IgG2a, k |
| CD140a                         | 556001      | BD              | Mouse IgG2a, k |
| CD140b                         | 558820      | BD              | Mouse IgG2a, k |
| CD141                          | 559780      | BD              | Mouse IgG1, k  |
| CD142                          | 550252      | BD              | Mouse IgG1, k  |
| CD143                          | ab11734     | Abcam           | Mouse IgG1     |
| CD144 (VE-cadherin) Cadherin 5 | 555661      | BD              | Mouse IgG1, k  |
| CD146                          | 550314      | BD              | Mouse IgG1, k  |
| CD147                          | 555961      | BD              | Mouse IgG1, k  |
| CD15 (SSEA-1)                  | 555400      | BD              | Mouse IgM, k   |
| CD150                          | 559591      | BD              | Mouse IgG1, k  |
| CD151                          | 556056      | BD              | Mouse IgG1, k  |
| CD152                          | 555851      | BD              | Mouse IgG2a, k |
| CD153 (CD30L)                  | 550052      | BD              | Mouse IgG1, k  |
| CD154 (CD40L)                  | 555698      | BD              | Mouse IgG1, k  |
| CD155                          | IM2755      | Beckman         | Mouse IgG1     |
| CD157                          | IM2557      | Beckman         | Mouse IgG1     |
| CD158a                         | 556061      | BD              | Mouse IgM, k   |
| CD158b                         | 559783      | BD              | Mouse IgG2b,k  |
| CD15S                          | 551344      | BD              | Mouse IgM, k   |
| CD16                           | 555404      | BD              | Mouse IgG1, k  |
| CD160                          | 551887      | BD              | Mouse IgM, k   |
| CD161                          | 556079      | BD              | Mouse IgG1, k  |
| CD162                          | 556053      | BD              | Mouse IgG1, k  |



|                      |          |           |                |
|----------------------|----------|-----------|----------------|
| CD163                | ab9246   | Abcam     | Mouse IgG1, k  |
| CD164                | 551296   | BD        | Mouse IgG2a, k |
| CD165                | 559453   | BD        | Mouse IgG1, k  |
| CD166                | 559260   | BD        | Mouse IgG1, k  |
| CD169 (Sialoadhesin) | MCA1844  | Serotec   | Mouse IgG1     |
| CD16b                | M1390clb | RDI       | Mouse IgG2b    |
| CD171                | CBL275   | Millipore | Mouse IgG1     |
| CD172a/b             | 552025   | BD        | Mouse IgG1, k  |
| CD172b               | 552024   | BD        | Mouse IgG1, k  |
| CD173                | MCA1984  | Serotec   | Mouse IgG1     |
| CD174                | MCA2160  | Serotec   | Mouse IgM      |
| CD175                | MCA1985  | Serotec   | Mouse IgG1     |
| CD176                | MCA2161  | Serotec   | Mouse IgM      |
| CD177                | 551899   | BD        | Mouse IgG1     |
| CD177                | ab8092   | Abcam     | Mouse IgG1     |
| CD178                | ab10511  | Abcam     | Mouse IgG1     |
| CD179a               | MCA2073  | Serotec   | Mouse IgM      |
| CD18                 | 555922   | BD        | Mouse IgG1, k  |
| CD180                | 551890   | BD        | Mouse IgG1, k  |
| CD183                | 557183   | BD        | Mouse IgG1, k  |
| CD184                | 555972   | BD        | Mouse IgG2a, k |
| CD19                 | 555410   | BD        | Mouse IgG1, k  |
| CD195 (CCR5)         | 555991   | BD        | Mouse IgG2a, k |
| CD1A                 | 555805   | BD        | Mouse IgG1, k  |
| CD1B                 | 555968   | BD        | Mouse IgG1, k  |
| CD1C                 | 550902   | BD        | Mouse IgG2a, k |
| CD1D                 | 550254   | BD        | Mouse IgG1, k  |
| CD2                  | 555324   | BD        | Mouse IgG1, k  |
| CD20                 | 555621   | BD        | Mouse IgG2b,k  |
| CD200                | 552023   | BD        | Mouse IgG1, k  |
| CD200R               | MCA2282  | Serotec   | Mouse IgG1     |
| CD201                | 552500   | BD        | Rat IgG1, k    |
| CD203c               | IM3575   | Beckman   | Mouse IgG1     |
| CD206                | 555953   | BD        | Mouse IgG1, k  |
| CD207                | IM3449   | Beckman   | Mouse IgG1     |
| CD208                | IM3578   | Beckman   | Mouse IgG1     |
| CD209                | 551186   | BD        | Mouse IgG2b,k  |
| CD21                 | 555421   | BD        | Mouse IgG1, k  |
| CD210 (II-10R)       | 556012   | BD        | Rat IgG2a, k   |
| CD212                | 556064   | BD        | Mouse IgG1, k  |
| CD22                 | 555423   | BD        | Mouse IgG1, k  |
| CD220                | 559954   | BD        | Mouse IgG1, k  |
| CD221                | 556000   | BD        | Mouse IgG1, k  |
| CD222                | 551982   | BD        | Mouse IgG1, k  |
| CD223                | 552378   | BD        | Rat IgG1, k    |
| CD226                | 559787   | BD        | Mouse IgG1, k  |
| CD227                | 555925   | BD        | Mouse IgG1, k  |
| CD229                | 552751   | BD        | Mouse IgG1, k  |
| CD23                 | 555708   | BD        | Mouse IgG1, k  |
| CD231                | 551896   | BD        | Mouse IgG1, k  |
| CD235a               | 555569   | BD        | Mouse IgG2b,k  |

|                        |          |           |                |
|------------------------|----------|-----------|----------------|
| CD236                  | MCA1983  | Serotec   | Mouse IgG1     |
| CD236R                 | MCA1986  | Serotec   | Mouse IgG1     |
| CD238                  | ab11463  | Abcam     | Mouse IgG1     |
| CD239                  | MCA1982  | Serotec   | Mouse IgG2b    |
| CD24                   | 555426   | BD        | Mouse IgG2a, k |
| CD24                   | ab3274   | Abcam     | Mouse IgG1     |
| CD240 DCE              | MCA1981  | Serotec   | Mouse IgG1     |
| CD243                  | ab10333  | Abcam     | Mouse IgG2a    |
| CD244 (2B4)            | 550814   | BD        | Mouse IgG2a, k |
| CD247                  | ab11281  | Abcam     | Mouse IgG2a    |
| CD249 Aminopeptidase A | 550491   | BD        | Mouse IgG1, k  |
| CD25                   | 555430   | BD        | Mouse IgG1, k  |
| CD26                   | 555435   | BD        | Mouse IgG1, k  |
| CD27                   | 555439   | BD        | Mouse IgG1, k  |
| CD28                   | M1650clb | RDI       | Mouse IgG1     |
| CD29 (integrin beta 1) | 556048   | BD        | Mouse IgG2a, k |
| CD3                    | 555330   | BD        | Mouse IgG1, k  |
| CD30                   | 555827   | BD        | Mouse IgG1, k  |
| CD31                   | 555444   | BD        | Mouse IgG1, k  |
| CD33                   | 555625   | BD        | Mouse IgG1, k  |
| CD34                   | 555820   | BD        | Mouse IgG1, k  |
| CD35                   | 555451   | BD        | Mouse IgG1, k  |
| CD36                   | 555453   | BD        | Mouse IgM, k   |
| CD37                   | 555456   | BD        | Mouse IgG1, k  |
| CD38                   | 555458   | BD        | Mouse IgG1, k  |
| CD39                   | 555643   | BD        | Mouse IgG2b,k  |
| CD4                    | 555344   | BD        | Mouse IgG1, k  |
| CD40                   | 555587   | BD        | Mouse IgG1, k  |
| CD41A                  | 555465   | BD        | Mouse IgG1, k  |
| CD41b                  | 555468   | BD        | Mouse IgG3, k  |
| CD42a                  | 558816   | BD        | Mouse IgG1, k  |
| CD42b                  | 555471   | BD        | Mouse IgG1, k  |
| CD43                   | 555474   | BD        | Mouse IgG1, k  |
| CD44                   | 550988   | BD        | Mouse IgG1, k  |
| CD44var (v10)          | MAB4079  | Millipore | Mouse IgG1, k  |
| CD45                   | 555480   | BD        | Mouse IgG1, k  |
| CD45RA                 | 555486   | BD        | Mouse IgG2b,k  |
| CD45RO                 | 555491   | BD        | Mouse IgG2a, k |
| CD46                   | 555948   | BD        | Mouse IgG2a, k |
| CD47                   | 556044   | BD        | Mouse IgG1, k  |
| CD48                   | 555758   | BD        | Mouse IgM, k   |
| CD49a                  | 559594   | BD        | Mouse IgG1     |
| CD49b                  | 555497   | BD        | Mouse IgG1, k  |
| CD49c                  | 556024   | BD        | Mouse IgG1, k  |
| CD49d                  | 555502   | BD        | Mouse IgG1, k  |
| CD49e                  | 555615   | BD        | Mouse IgG1, k  |
| CD49f                  | 555734   | BD        | Rat IgG2a, k   |
| CD5                    | 555350   | BD        | Mouse IgG1, k  |
| CD50                   | 555957   | BD        | Mouse IgG2b,k  |
| CD51-61                | 555504   | BD        | Mouse IgG1     |
| CD53                   | 555506   | BD        | Mouse IgG1, k  |

|             |           |        |                |
|-------------|-----------|--------|----------------|
| CD53        | ab667     | Abcam  | Mouse IgG1     |
| CD54        | 555510    | BD     | Mouse IgG1, k  |
| CD55        | 555691    | BD     | Mouse IgG2a, k |
| CD56        | 559043    | BD     | Mouse IgG2b    |
| CD57        | 555618    | BD     | Mouse IgM, k   |
| CD58        | 555919    | BD     | Mouse IgG2a    |
| CD58 (LFA3) | ab6127    | Abcam  | Mouse IgG2a    |
| CD59        | 555761    | BD     | Mouse IgG2a, k |
| CD6         | 555356    | BD     | Mouse IgG1, k  |
| CD61        | 555752    | BD     | Mouse IgG1, k  |
| CD62b       | 555723    | BD     | Mouse IgM      |
| CD62e       | 555648    | BD     | Mouse IgG1, k  |
| CD62L       | 555542    | BD     | Mouse IgG1, k  |
| CD62p       | 555522    | BD     | Mouse IgG1, k  |
| CD63        | 556019    | BD     | Mouse IgG1, k  |
| CD64        | 555525    | BD     | Mouse IgG1, k  |
| CD65s       | MHCD65s01 | Caltag | Mouse IgM      |
| CD66        | 551355    | BD     | Mouse IgG1, k  |
| CD66b       | 555723    | BD     | Mouse IgM, k   |
| CD66e       | ab4451    | Abcam  | Mouse IgG1     |
| CD66f       | 559587    | BD     | Mouse IgG1, k  |
| CD67        | MON1052   | Caltag | Mouse IgG1     |
| CD68        | 556059    | BD     | Mouse IgG2b,k  |
| CD69        | 555529    | BD     | Mouse IgG1, k  |
| CD7         | 555359    | BD     | Mouse IgG1, k  |
| CD70        | 555833    | BD     | Mouse IgG3, k  |
| CD71        | 555534    | BD     | Mouse IgG2a, k |
| CD72        | 555917    | BD     | Mouse IgG2b,k  |
| CD73        | 550256    | BD     | Mouse IgG1, k  |
| CD74        | 555538    | BD     | Mouse IgG2a, k |
| CD77        | 551352    | BD     | Mouse IgM, k   |
| CD79a       | ab3121    | Abcam  | Mouse IgG1, k  |
| CD79b       | ab3275    | Abcam  | Mouse IgG1, k  |
| CD8         | 555631    | BD     | Mouse IgG1, k  |
| CD80        | 557223    | BD     | Mouse IgG1, k  |
| CD81        | 555675    | BD     | Mouse IgG1, k  |
| CD82        | CD82-BL2  | RDI    | Mouse IgG1     |
| CD83        | 556854    | BD     | Mouse IgG1, k  |
| CD84        | 559588    | BD     | Mouse IgG1, k  |
| CD85        | CD85-GHI  | RDI    | Mouse IgG2b    |
| CD86        | 555663    | BD     | Mouse IgG2b,k  |
| CD87        | 555767    | BD     | Mouse IgG1, k  |
| CD88        | 550493    | BD     | Mouse IgG1, k  |
| CD89        | CD89-A59  | RDI    | Mouse IgG1, k  |
| CD9         | 555370    | BD     | Mouse IgG1, k  |
| CD90        | 555593    | BD     | Mouse IgG1, k  |
| CD91        | 550495    | BD     | Mouse IgG1, k  |
| CD92        | 555769    | BD     | Mouse IgG2b,k  |
| CD94        | 555887    | BD     | Mouse IgG1, k  |
| CD95        | 555671    | BD     | Mouse IgG1, k  |
| CD97        | 555772    | BD     | Mouse IgG1, k  |

|                                   |            |             |                |
|-----------------------------------|------------|-------------|----------------|
| CD98                              | 556074     | BD          | Mouse IgG1, k  |
| CD99                              | 555687     | BD          | Mouse IgG2a, k |
| CD99R                             | 555817     | BD          | Mouse IgM, k   |
| CDw125                            | 555901     | BD          | Mouse IgG1, k  |
| CDw128                            | 555937     | BD          | Mouse IgG2b,k  |
| CDw128b                           | 555932     | BD          | Mouse IgG1     |
| CDw131                            | 554534     | BD          | Mouse IgG1, k  |
| CDw149                            | CBL551     | Millipore   | Mouse IgG2a    |
| CDw17                             | CBL463     | RDI         | Mouse IgM      |
| CDw210                            | ab10777    | Abcam       | Mouse IgG1     |
| CDw60                             | 550812     | BD          | Mouse IgM, k   |
| CDw75                             | ab9515     | Abcam       | Mouse IgM, k   |
| CDw93                             | 551531     | BD          | Mouse IgG2b,k  |
| CNTF Receptor alpha               | MAB303     | R&D         | Mouse IgG2b    |
| Contactin-1                       | MAB904     | R&D         | Mouse IgG1     |
| CRTAM                             | MAB1695    | R&D         | Mouse IgG      |
| CTLA-4                            | MAB325     | R&D         | Mouse IgG2b    |
| CXCR-1 (IL-8 RA)                  | MAB330     | R&D         | Mouse IgG2a    |
| CXCR-2 (IL-8 RB)                  | MAB331     | R&D         | Mouse IgG2a    |
| CXCR3                             | MAB160     | R&D         | Mouse IgG1     |
| CXCR4 (fusin)                     | MAB171     | R&D         | Mouse IgG2a    |
| CXCR-5 (BLT-1)                    | MAB190     | R&D         | Mouse IgG2b    |
| CXCR6                             | MAB699     | R&D         | Mouse IgG2b    |
| D6                                | MAB1364    | R&D         | Rat IgG2a      |
| DAN                               | MAB955     | R&D         | Mouse IgG2b    |
| DR3 (TNFRSF25)                    | 307101     | Biologend   | Mouse IgG1, k  |
| DR3 (TNFRSF25)                    | MAB943     | R&D         | Mouse IgG1     |
| DR6 (TNFRF21)                     | MAB1441    | R&D         | Mouse IgG1     |
| Dtk                               | MAB859     | R&D         | Mouse IgG1     |
| E-Cadherin                        | 13-1700    | Invitrogen  | Mouse IgG1     |
| EGF-Receptor                      | 555996     | BD          | Mouse IgG2b,k  |
| EGF-Receptor                      | MAB1095    | R&D         | Mouse IgG2b    |
| Endothelin-1 Receptor             | 611253     | BD          | Mouse IgG1     |
| EpCAM                             | 347197     | BD          | Mouse IgG1     |
| EpCAM                             | 14-9326-80 | eBioscience | Mouse IgG1, k  |
| EpCAM                             | MAB960     | R&D         | Mouse IgG2a    |
| Eph B4                            | 352900     | Invitrogen  | Mouse IgG1, k  |
| Ephrin-A3                         | MAB359     | R&D         | Mouse IgG2a    |
| Ephrin-A4                         | MAB369     | R&D         | Mouse IgG2b    |
| Ephrin-B3                         | MAB395     | R&D         | Mouse IgG2b    |
| Epithelial specific antigen (ESA) | CBL251     | Millipore   | Mouse IgG1     |
| Epithelial specific antigen (ESA) | V1048      | Biomeda     | Mouse IgG1, k  |
| ErbB2                             | MAB1129    | R&D         | Mouse IgG2b    |
| ErbB4                             | MAB1131    | R&D         | Mouse IgG2b    |
| FAS Ligand                        | 556372     | BD          | Mouse IgG1     |
| FGF Receptor 1 (IIIb)             | MAB765     | R&D         | Mouse IgG1     |
| FGF Receptor 2                    | MAB6843    | R&D         | Mouse IgG1     |
| FGF Receptor 3                    | MAB766     | R&D         | Mouse IgG1     |
| FGF Receptor 4                    | 324301     | Biologend   | Mouse IgG1, k  |
| FGF Receptor 4                    | MAB6852    | R&D         | Rat IgG2a      |
| FMC7                              | MCA792F    | Serotec     | Mouse IgM      |

|                                   |          |           |                |
|-----------------------------------|----------|-----------|----------------|
| fMLP Receptor                     | 556015   | BD        | Mouse IgG1, k  |
| FMS (CD115)                       | 556385   | BD        | Rat IgG2a      |
| Frizzled-1                        | MAB11201 | R&D       | Rat IgG2a      |
| Frizzled-3                        | MAB1001  | R&D       | Rat IgG2a      |
| Frizzled-4                        | 326601   | Biologend | Mouse IgG1, k  |
| Frizzled-4                        | MAB194   | R&D       | Rat IgG2a      |
| Frizzled-7                        | MAB1981  | R&D       | Rat IgG2a      |
| Frizzled-9                        | 326701   | Biologend | Mouse IgM, k   |
| GABAa Receptor Alpha chain        | MAB339   | Millipore | Mouse IgG1     |
| GABAa Receptor Beta chain         | MAB341   | Millipore | Mouse IgG1     |
| Galactocerebroside                | MAB342   | Millipore | Mouse IgG3     |
| Galectin-3                        | 556904   | BD        | Mouse IgG1, k  |
| GAP-43 (B-50)                     | MAB347   | Millipore | Mouse IgG1     |
| GFRa-3 (GDNF receptor alpha 3)    | MAB6701  | R&D       | Mouse IgG1     |
| GHR                               | MAB1210  | R&D       | Mouse IgG2b    |
| Gi alpha-2                        | MAB3077  | Millipore | Mouse IgG2b    |
| GITR                              | MAB689   | R&D       | Mouse IgG1     |
| GITR L                            | MAB6942  | R&D       | Mouse IgG1     |
| Glucose Transporter 1 (Glut1)     | MAB1418  | R&D       | Mouse IgG2b    |
| Glucose Transporter 2 (Glut2)     | MAB1414  | R&D       | Mouse IgG2a    |
| Glucose Transporter 3 (Glut3)     | MAB1415  | R&D       | Mouse IgG2b    |
| Glucose Transporter 5 (Glut5)     | MAB1349  | R&D       | Mouse IgG2a    |
| Go alpha                          | MAB3073  | Millipore | Mouse IgG1     |
| GP130                             | MAB628   | R&D       | Mouse IgG1     |
| GP230                             | 559447   | BD        | Mouse IgM, k   |
| Granzyme A                        | 557449   | BD        | Mouse IgG1     |
| Heparin Sulfate                   | MAB2040  | Millipore | Mouse IgG1     |
| HGF Receptor                      | MAB358   | R&D       | Mouse IgG2a    |
| High affinity choline transporter | MAB5420  | Millipore | Mouse IgG      |
| HLA-A, B, C                       | 311401   | Biologend | Mouse IgG2a, k |
| HVEM (TNFRSF14)                   | MAB3561  | R&D       | Mouse IgG1     |
| IL3R/IL5R/GMCSFR                  | 554534   | BD        | Mouse IgG1     |
| IL-4 Ra                           | 551894   | BD        | Mouse IgG1, k  |
| IL-6 R                            | 551462   | BD        | Mouse IgG1, k  |
| integrin beta 7                   | 555943   | BD        | Rat IgG2a, k   |
| Jagged-1                          | MAB1277  | R&D       | Mouse IgG2b    |
| JAM-3                             | MAB1189  | R&D       | Mouse IgG1     |
| LAIR-1                            | 550810   | BD        | Mouse IgG1, k  |
| Leptin Receptor                   | MAB867   | R&D       | Mouse IgG2b    |
| LIF Receptor                      | 559778   | BD        | Mouse IgG1, k  |
| LMP-1                             | 559898   | BD        | Mouse IgG2a, k |
| Macrophages L.S.I.                | MAB1569  | Millipore | Mouse IgG1     |
| MCAM (CD146)                      | MAB932   | R&D       | Mouse IgG1     |
| M-CSF Receptor                    | MAB329   | R&D       | Mouse IgG1     |
| MDR (P-glycoprotein)              | 557001   | BD        | Mouse IgG2b,k  |
| MDR1                              | MAB4161  | Millipore | Mouse IgG2a, k |
| MDR1                              | MAB4163  | Millipore | Mouse IgG2a, k |
| MDR1                              | MAB4334  | Millipore | Mouse IgG2a, k |
| MER                               | MAB891   | R&D       | Mouse IgG2a    |
| MSP Receptor                      | MAB691   | R&D       | Mouse IgG1     |
| MUC2                              | 555926   | BD        | Mouse IgG1, k  |

|                             |          |           |                |
|-----------------------------|----------|-----------|----------------|
| Mu-Calpain                  | 550935   | BD        | Mouse IgG1, k  |
| Myelin/Oligodendrocyte S.P. | MAB328   | Millipore | Mouse IgM      |
| N-Cadherin                  | ab19348  | Abcam     | Mouse IgG      |
| NCAM-L1                     | MAB777   | R&D       | Mouse IgG1     |
| Neuritin                    | MAB283   | R&D       | Mouse IgG2b    |
| NGF Receptor                | 557194   | BD        | Mouse IgG1, k  |
| NMDAR2B                     | MAB5220  | Millipore | Mouse IgG1     |
| NRG-1-b1/HRG-b1             | MAB3771  | R&D       | Mouse IgG1     |
| Oligodendrocyte marker O1   | MAB1327  | R&D       | Mouse IgM      |
| Oligodendrocyte marker O4   | MAB1326  | R&D       | Mouse IgM      |
| OV-6                        | MAB2020  | R&D       | Mouse IgG      |
| p-Cadherin                  | 610227   | BD        | Mouse IgG1     |
| PD-L2                       | MAB1224  | R&D       | Mouse IgG2b,k  |
| Prominin 2                  | MAB2024  | R&D       | Mouse IgG      |
| RAGE                        | MAB5328  | Millipore | Mouse IgG2a, k |
| Reck                        | 611512   | BD        | Mouse IgG1     |
| Reck                        | MAB1734  | R&D       | Mouse IgG1     |
| Ror2                        | MAB2064  | R&D       | Mouse IgG1     |
| Semaphorin 6A               | MAB1146  | R&D       | Mouse IgG2b    |
| Semaphorin 7A               | MAB2068  | R&D       | Rat IgG2b      |
| Siglec 6                    | 550908   | BD        | Mouse IgG1, k  |
| SSEA-1                      | MAB4301  | Millipore | Mouse IgM      |
| SSEA-3                      | MAB4303  | Millipore | Rat IgM        |
| SSEA-4                      | MAB4304  | Millipore | Mouse IgG3     |
| TAP2                        | 551292   | BD        | Mouse IgG1     |
| TGF beta Receptor 2         | MAB241   | R&D       | Mouse IgG      |
| TGF beta Receptor 3         | MAB242   | R&D       | Mouse IgG1     |
| Thrombopoietin Receptor     | MAB10161 | R&D       | Mouse IgG2b    |
| Thymus stroma               | 555825   | BD        | Mouse IgM, k   |
| Tie-1                       | MAB619   | R&D       | Mouse IgG1     |
| Tie-2                       | MAB313   | R&D       | Mouse IgG1     |
| TIM 1                       | MAB1750  | R&D       | Mouse IgG      |
| TNF Receptor 1 (TNFRSF1A)   | MAB625   | R&D       | Mouse IgG1     |
| TNF Receptor 2 (TNFRSF1B)   | MAB726   | R&D       | Mouse IgG1     |
| TNF Receptor Type II        | 551311   | BD        | Rat IgG2b, k   |
| Toll Like Receptor 1 (TLR1) | MCA2153  | Serotec   | Mouse IgG1     |
| Toll Like Receptor 2 (TLR2) | MCA2152  | Serotec   | Mouse IgG2a    |
| Toll Like Receptor 3 (TLR3) | MCA2267  | Serotec   | Mouse IgG1     |
| Toll Like Receptor 4 (TLR4) | 551964   | BD        | Mouse IgG2a, k |
| Toll Like Receptor 5 (TLR5) | 558632   | BD        | Mouse IgG1     |
| Toll Like Recptor 9 (TLR9)  | MCA2265  | Serotec   | Mouse IgG2a    |
| TRA-1-60                    | MAB4360  | Millipore | Mouse IgM      |
| TRA-1-81                    | MAB4381  | Millipore | Mouse IgM      |
| TRAIL R2 (DR5/TNFRSF10B)    | MAB631   | R&D       | Mouse IgG1     |
| TRAIL R3 (DcR1/TNFRSF10C)   | MAB6301  | R&D       | Mouse IgG1     |
| TRAIL R4 (DcR2/TNFRSF10D)   | MAB633   | R&D       | Mouse IgG1     |
| TrkA Neurotrophin receptor  | MAB175   | R&D       | Mouse IgG2a    |
| TrkA Neurotrophin receptor  | MAB1751  | R&D       | Mouse IgG1     |
| Trkc                        | MAB3731  | R&D       | Mouse IgG      |
| TROP-2                      | MAB650   | R&D       | Mouse IgG2a    |
| TSLP Receptor               | MAB981   | R&D       | Mouse IgG1     |

|                 |         |     |            |
|-----------------|---------|-----|------------|
| uPAR (CD87)     | MAB807  | R&D | Mouse IgG1 |
| VCAM-1 (CD106)  | BBA5    | R&D | Mouse IgG1 |
| VE cadherin     | MAB938  | R&D | Mouse IgG1 |
| VEGF R1 (Flt-1) | MAB321  | R&D | Mouse IgG1 |
| VEGF R2 (KDR)   | MAB3571 | R&D | Mouse IgG1 |
| VEGF R3 (Flt-4) | MAB743  | R&D | Mouse IgG1 |

**\*Manufacturer list**

Abcam  
 BD (BD Bioscience)  
 Beckman (Beckman Coulter)  
 Biologend  
 Biomeda  
 Caltag (Caltag Laboratories)  
 Millipore  
 Miltenyi Biotec  
 Progen (PROGEN Biotechnik GmbH)  
 R&D (R&D Systems)  
 RDI (Division of Fitzgerald Industries Intl )  
 Serotec (AbD Serotec)  
 Invitrogen

**Supplementary Table 2**

**Cell surface marker profile changes in response to differentiation treatments**

3 days of treatment with RA and BMP4 led to changes in either most of the cells or changes that were restricted to small subsets (1-10%) of them. Markers are listed by functional category and type of change.

| <b>Functional category:</b>     | <b>Population percentile change</b>                          |                                                     | <b>Uniform change</b>             |
|---------------------------------|--------------------------------------------------------------|-----------------------------------------------------|-----------------------------------|
|                                 | <b>&gt;10 of cells</b>                                       | <b>&lt;10 of cells</b>                              | <b>&gt;x5 MFI</b>                 |
| <u>Adhesion molecules</u>       | CD166<br>CD56 (B)<br>CD44*<br>CD50*                          |                                                     | CD155*<br>CD165*<br>LFA-3*        |
| <u>TGF-β superfamily</u>        |                                                              | TGFβR2                                              |                                   |
| <u>Receptor tyrosine kinase</u> | FGF-R3*                                                      | EGF-R (B)<br>CD117 (B)                              | CD220                             |
| <u>Prominins</u>                | CD133*                                                       |                                                     |                                   |
| <u>Tetraspanins</u>             |                                                              |                                                     | CD9*                              |
| <u>TNF family</u>               | Trail R3*                                                    | NGF-R                                               | CD30*<br>TNF-R1*<br>Trail R2*     |
| <u>Cytokine receptors</u>       |                                                              | LIFR (B)<br>gp130 (B)                               |                                   |
| <u>Chemokine receptors</u>      |                                                              | CCR9                                                |                                   |
| <u>Transporters</u>             |                                                              | ABCG2 (B)                                           |                                   |
| <u>Carbohydrates</u>            | CD173<br>SSEA1<br>TRA-1-60*<br>TRA-1-81*<br>SSEA3*<br>SSEA4* |                                                     |                                   |
| <u>Wnt receptors</u>            |                                                              | Ror2 (B)                                            | Frizzled 9*                       |
| <u>Semaphorin</u>               | CD100*                                                       |                                                     |                                   |
| <u>Cadherins</u>                | N*<br>6                                                      |                                                     |                                   |
| <u>Peptidases</u>               | CD249                                                        | CD13 (B)<br>CD26 (B)                                | BACE*                             |
| <u>Others</u>                   |                                                              | CD60b<br>CD87<br>CD107a<br>CD107b<br>CD138*<br>OV6# | CD57*<br>CD90*<br>CD200*<br>CD227 |

All markers in table indicate upregulation in differentiation except those marked by \*.

\* Denotes downregulation of the marker following differentiation treatment. # Indicates the existence of positive population in all differentiation conditions.



### Supplementary Table 3

#### Cell surface markers of undifferentiated hESCs

Median fluorescence intensity (MFI) of immunostained CM-treated cells was used to categorize markers according to expression level. High, intermediate, and low expressed markers have MFI of >100, 10 to 100, or <10, respectively. Expression of previously reported hESC markers, including SSEA-4, SSEA-3, Tra-1-60 and Tra-1-81) was confirmed. Marker lists are divided to functional categories.

| Functional category                       | Expression level                                                             |                                                             |                                            |
|-------------------------------------------|------------------------------------------------------------------------------|-------------------------------------------------------------|--------------------------------------------|
|                                           | high>100                                                                     | med 100>x>15                                                | 15>low                                     |
| <u>Integrins</u>                          | $\alpha$ 2<br>$\alpha$ 3<br>$\alpha$ 5<br>$\alpha$ 6                         | $\alpha$ 1                                                  | $\alpha$ 4<br>$\beta$ 1<br>$\beta$ 4       |
| <u>Adhesion molecules</u>                 | CD24<br>CD44*<br>CD50*<br>CD146<br>CD155<br>CD165<br>CD166<br>CD239<br>EpCAM | CD54<br>CD56<br>CD164<br>CD171<br>Jam-3<br>LFA-3<br>NCAM-L1 | Contactin 1                                |
| <u>TGF-<math>\beta</math> superfamily</u> |                                                                              | Alk1                                                        | CD109<br>TGF- $\beta$ R3                   |
| <u>Receptor tyrosine kinase</u>           |                                                                              | Axl<br>CD220<br>CD221<br>CD222<br>DTK<br>FGF-R4<br>VEGF-R1  | CD117<br>EGF-R<br>ERBb2<br>FGF-R3<br>MSP-R |
| <u>Prominins</u>                          | CD133<br>Prominin 2                                                          |                                                             |                                            |
| <u>Tetraspanins</u>                       | CD9<br>CD81<br>CD151                                                         |                                                             | CD82                                       |
| <u>TNF family</u>                         | CD30                                                                         | CD40<br>NGF-R<br>TNF-R1<br>Trail R2<br>Trail R3             | BAFF<br>CD95<br>TNF-R2                     |
| <u>Cytokine receptors</u>                 |                                                                              | CD119<br>Tpo-R                                              | LIF-R<br>gp130                             |
| <u>Chemokine receptors</u>                |                                                                              | CCR4                                                        | CXCR4#                                     |
| <u>Transporters</u>                       | CD98                                                                         | CD71                                                        | CD92                                       |
| <u>Complement</u>                         | CD46<br>CD55<br>CD59                                                         |                                                             | CD21                                       |
| <u>Carbohydrates</u>                      | TRA-1-60*<br>SSEA4*                                                          | TRA-1-81*                                                   | CD173#<br>SSEA1#                           |

|                      |             |                         |            |
|----------------------|-------------|-------------------------|------------|
| <u>Wnt receptors</u> | SSEA3       |                         |            |
|                      | Frizzled 3  | Frizzled 4              | Frizzled 1 |
|                      | Frizzled 9  |                         | Frizzled 7 |
| <u>Semaphorin</u>    | CD100*      | 6A                      | CD108      |
| <u>Cadherins</u>     | E           | N*                      |            |
|                      |             | VE                      |            |
| <u>Others</u>        | CD57        | $\beta$ 2-microglobulin | BACE       |
|                      | CD90        | CD47                    | CD73#      |
|                      | CD91        | CD142                   | CD99       |
|                      | CD138*      | CD172a/b                | CD141      |
|                      | CD147       | Gi-a2                   | PD-L2      |
|                      | CD200       |                         |            |
|                      | CD227#      |                         |            |
|                      | HLA-A, B, C |                         |            |

# Positive subpopulation in CM

\* Negative subpopulation in CM

**Supplementary Table 4**  
**TaqMan assays provided by Applied Biosystems**

|                       |                      |                      |
|-----------------------|----------------------|----------------------|
| ACTB-Hs99999903_m1    | HAND1-Hs00231848_m1  | SNAI2-Hs00161904_m1  |
| ACVR1B-Hs00923299_m1  | HESX1-Hs00172696_m1  | SOX17-Hs00751752_s1  |
| ACVR1-Hs00153836_m1   | HHEX-Hs00242160_m1   | SOX2-Hs01053049_s1   |
| AFP-Hs00173490_m1     | HNF4G-Hs01071345_m1  | SOX7-Hs00846731_s1   |
| ALPL-Hs00758162_m1    | HOXA11-Hs00194149_m1 | STAT3-Hs00374280_m1  |
| AMOT-Hs00611096_m1    | HOXA13-Hs00426284_m1 | TBX3-Hs00195612_m1   |
| BMP2-Hs00154192_m1    | HOXA1-Hs00171793_m1  | TBX4-Hs00218515_m1   |
| BMP4-Hs00370078_m1    | HOXA2-Hs00534579_m1  | TDGF1-Hs02339499_g1  |
| BMPR1A-Hs01034909_g1  | IFITM1-Hs01652522_g1 | T-Hs00610080_m1      |
| BMPR2-Hs00176148_m1   | IFITM2-Hs00829485_sH | TWIST1-Hs00361186_m1 |
| CDX2-Hs00230919_m1    | IFITM3-Hs01635484_gH | VEGFC-Hs00153458_m1  |
| CER1-Hs00193796_m1    | IHH-Hs01081801_m1    | WNT3-Hs00229135_m1   |
| CGA-Hs00174938_m1     | IRX3-Hs00735523_m1   | WWP2-Hs00941266_g1   |
| CHRD-Hs00415315_m1    | ISL1-Hs00158126_m1   | ZFP42-Hs01938187_s1  |
| CSHL1-Hs00792427_g1   | KIT-Hs00174029_m1    |                      |
| CXCR4-Hs00237052_m1   | LEFTY1-Hs00764128_s1 |                      |
| DAB2-Hs01120081_m1    | LEFTY2-Hs00745761_s1 |                      |
| DAZL-Hs00154706_m1    | LHX1-Hs00232144_m1   |                      |
| DCAMKL2-Hs00382191_m1 | LIN28-Hs00702808_s1  |                      |
| DDX4-Hs00251859_m1    | LMO2-Hs00277106_m1   |                      |
| DKK1-Hs00183740_m1    | MEIS2-Hs00542638_m1  |                      |
| DNMT3B-Hs00171876_m1  | MESP1-Hs00251489_m1  |                      |
| DPPA3-Hs01931905_g1   | MEST-Hs00853380_g1   |                      |
| EED-Hs00243609_m1     | MIXL1-Hs00430824_g1  |                      |
| ELF5-Hs01063022_m1    | NANOG-Hs02387400_g1  |                      |
| EN2-Hs00171321_m1     | NANOS1-Hs00996068_s1 |                      |
| EOMES-Hs00172872_m1   | NCAM2-Hs00189850_m1  |                      |
| ESX1-Hs00538057_m1    | NES-Hs00707120_s1    |                      |
| FGF2-Hs00266645_m1    | NODAL-Hs00250630_s1  |                      |
| FGF4-Hs00173564_m1    | NOG-Hs00271352_s1    |                      |
| FGF5-Hs00170454_m1    | NOTCH1-Hs00413187_m1 |                      |
| FGF8-Hs00171832_m1    | NR2F2-Hs00819630_m1  |                      |
| FGFR2-Hs00240796_m1   | OTX2-Hs00222238_m1   |                      |
| FOXA1-Hs00270129_m1   | PAX6-Hs00240871_m1   |                      |
| FOXA2-Hs00232764_m1   | PCP4-Hs01113638_m1   |                      |
| FOXA3-Hs00270130_m1   | PITX2-Hs00165626_m1  |                      |
| FOXH1-Hs00182690_m1   | POU5F1-Hs00742896_s1 |                      |
| FZD8-Hs00259040_s1    | POU5F1-Hs01895061_u1 |                      |
| GAPDH-Hs99999905_m1   | PRDM1-Hs00153357_m1  |                      |
| GATA2-Hs00231119_m1   | PRRX1-Hs00246567_m1  |                      |
| GATA3-Hs00231122_m1   | RPLP0-Hs99999902_m1  |                      |
| GATA4-Hs00171403_m1   | SFRP1-Hs00610060_m1  |                      |
| GATA6-Hs00232018_m1   | SFRP5-Hs00169366_m1  |                      |
| GBX2-Hs00230965_m1    | SIX3-Hs00193667_m1   |                      |
| GDF3-Hs00220998_m1    | SMAD1-Hs00195432_m1  |                      |
| GSC-Hs00418279_m1     | SMAD2-Hs00183425_m1  |                      |

\* Some assays were tested individually, therefore list exceeds 96 TLDA genes

**Supplementary Table 5****TaqMan assays used for single cell qRT-PCR****Analysis of sorted human CXCR4+/- cells**

\*GAPDH-Hs99999905\_m1  
\*POU5F1-Hs00742896\_s1  
MESP1-Hs00251489\_m1  
T-Hs00610075\_g1  
SOX17-Hs00751752\_s1  
FOXA2-Hs00232764\_m1  
PRDM1-Hs00153357\_m1  
EOMES-Hs00172872\_m1  
MIXL1-Hs00430824\_g1

**Analysis of sorted epiblast CXCR4+/- cells**

GAPDH-Mm99999915\_g1  
POU5F1-Mm03053917\_g1  
SOX17-Mm00488363\_m1  
FOXA2-Mm01976556\_s1  
NANOG-Mm02019550\_s1  
GATA4-Mm00484689\_m1  
GATA6- Mm00802636\_m1  
VILLIN-Mm00494156\_m1

\* TaqMan assays used for "digital qRT-PCR"

**Analysis of sorted human Ror2+/- cells**

GAPDH-Hs99999905\_m1  
POU5F1-Hs00742896\_s1  
\*MESP1-Hs00251489\_m1  
\*T-Hs00610075\_g1  
SOX17-Hs00751752\_s1  
ROR2-Hs00171695\_m1  
WNT3-Hs00229135\_m1  
GATA4-Hs00171403\_m1  
MESP2-HS02742533
